# Supplementary material for: Short-term plasticity at cerebellar granule cell to molecular layer interneuron synapses expands information processing
Source: eLife journal article supplement (doi:10.7554/elife.41586), 2019-05-13
Supplement: supp [file elife-41586-supp-v1.zip]

Archive with 10 entries (10 files):
- elife_poa_e41586_Figure_2_figure_supplement_1.pdf
- elife_poa_e41586_Figure_1_figure_supplement_1.pdf
- elife_poa_e41586_Figure_3_figure_supplement_2.pdf
- elife_poa_e41586_Figure_3_figure_supplement_1.pdf
- elife_poa_e41586_Figure_2_figure_supplement_2.pdf
- elife_poa_e41586_Transparent_Reporting_File.pdf
- elife_poa_e41586_Figure_7_figure_supplement_2.pdf
- elife_poa_e41586_Figure_2_figure_supplement_3.pdf
- elife_poa_e41586_Transparent_Reporting_File.pdf
- elife_poa_e41586_Figure_7_figure_supplement_1.pdf
