# Supplementary figures and images for: Short-term plasticity at cerebellar granule cell to molecular layer interneuron synapses expands information processing
Source: eLife journal article supplement (doi:10.7554/elife.41586), 2019-05-13

A

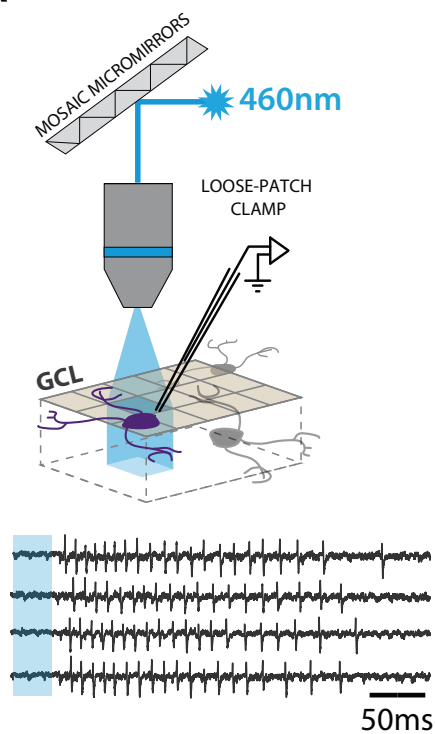

B

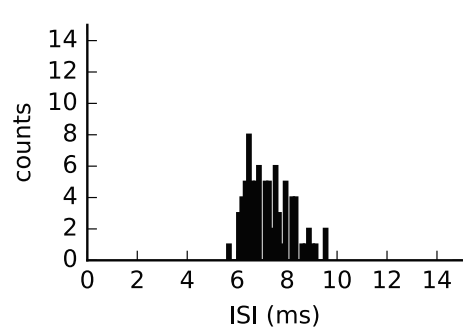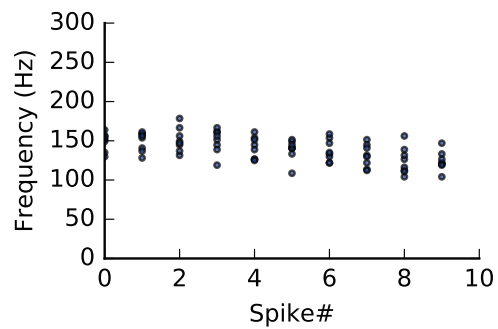

C

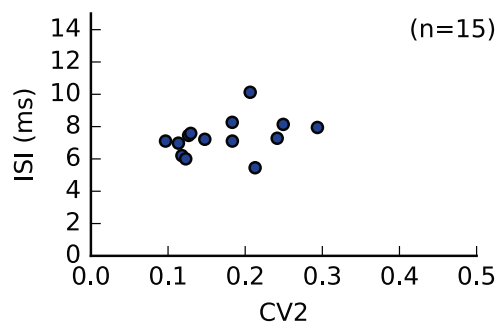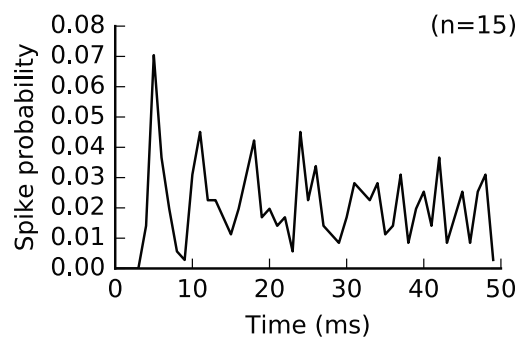

Supplement: supp [file elife-41586-supp-v1.zip]

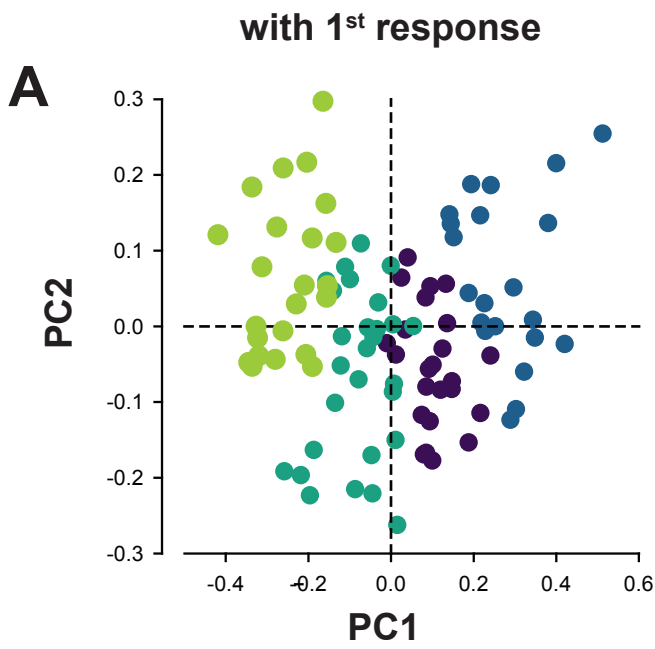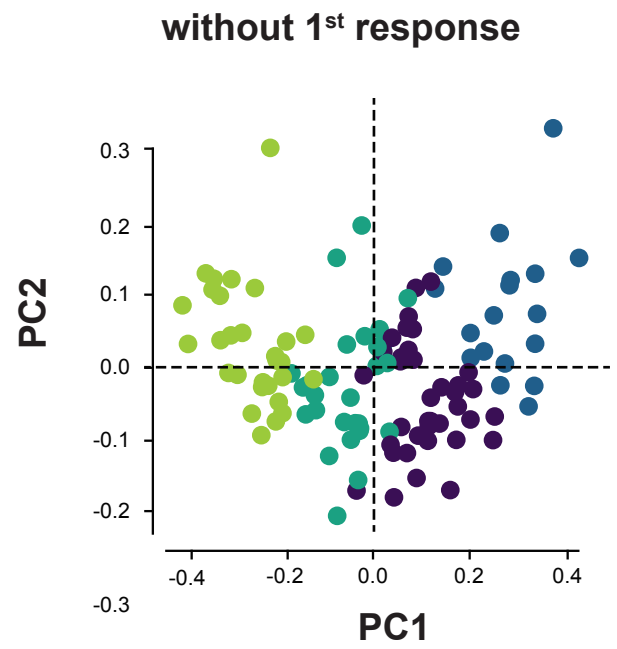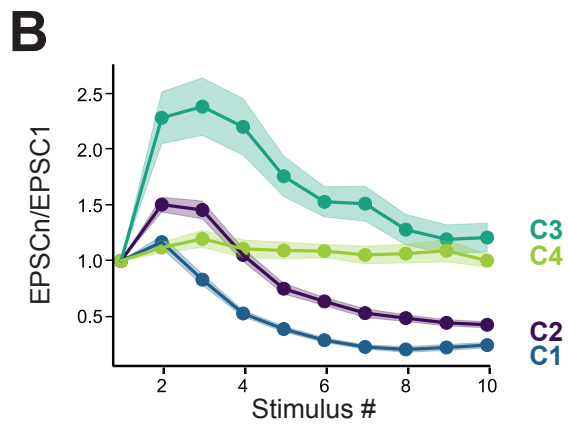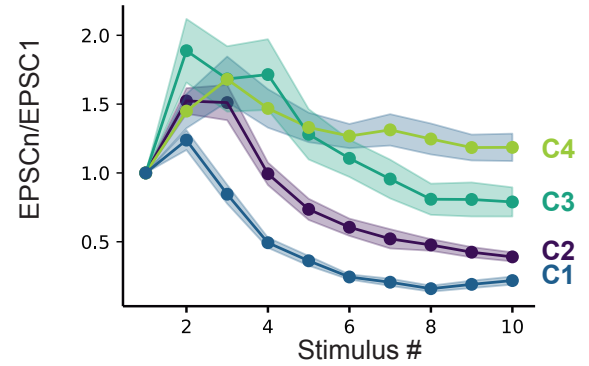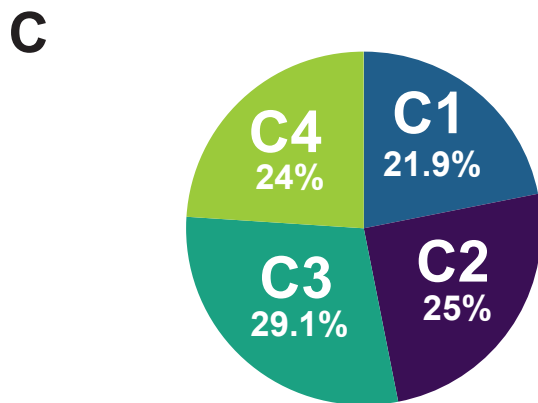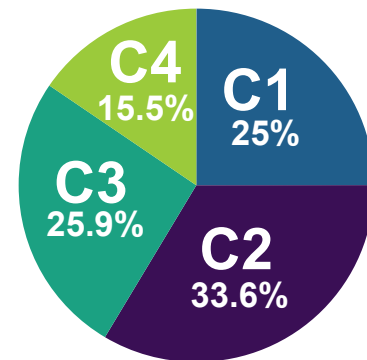

Supplement: supp [file elife-41586-supp-v1.zip]

A

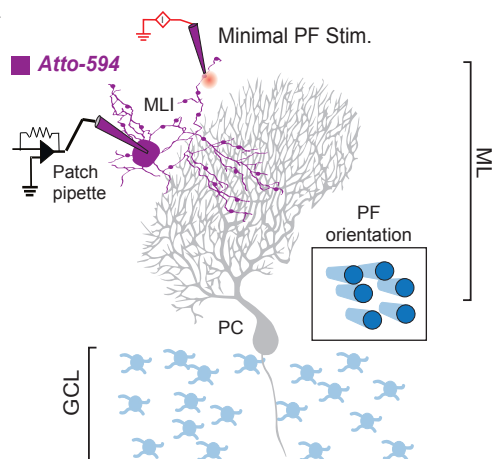

B

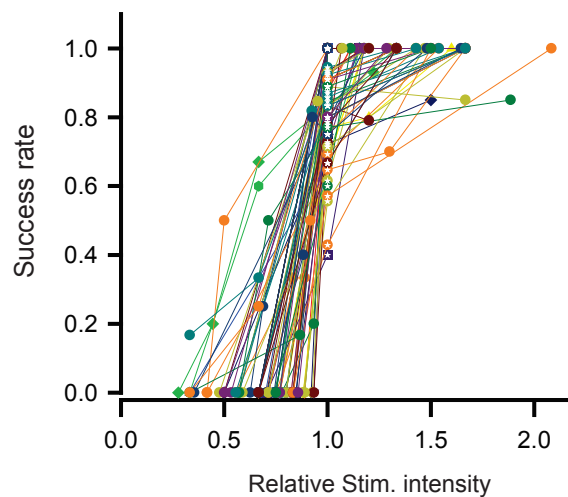

C

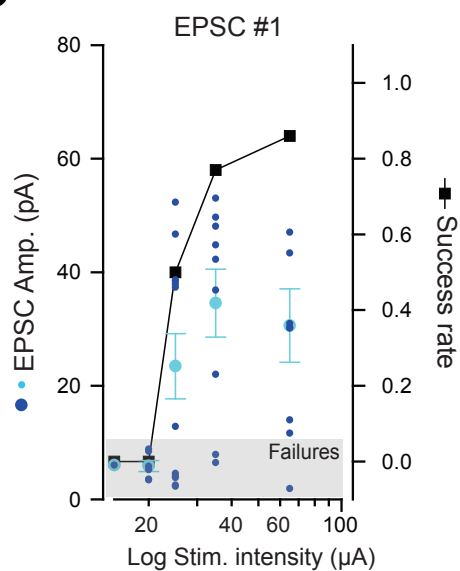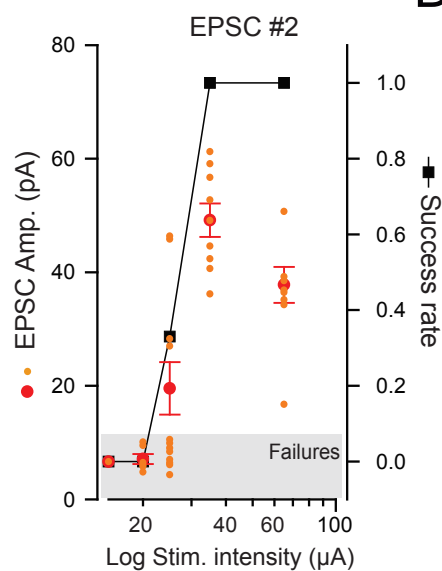

D

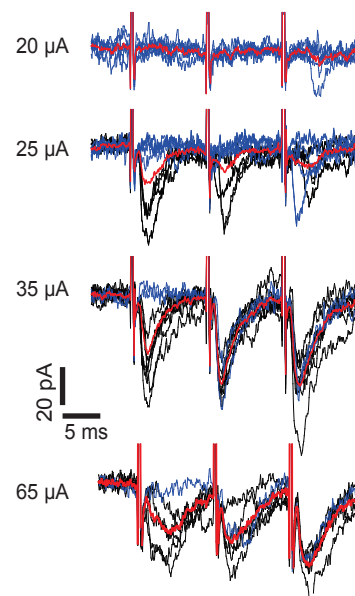

E

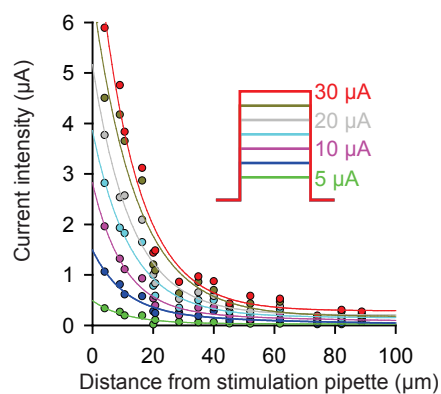

F

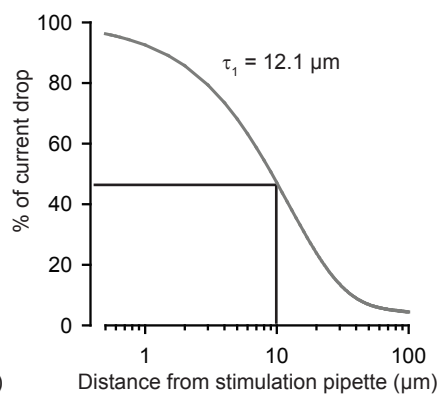

G

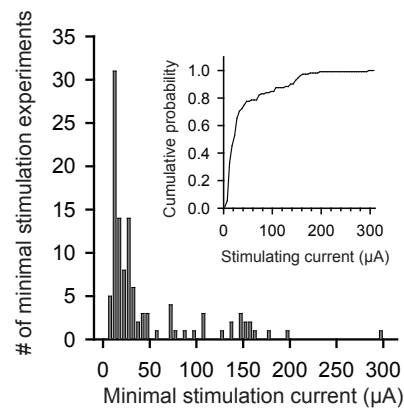

Supplement: supp [file elife-41586-supp-v1.zip]

A

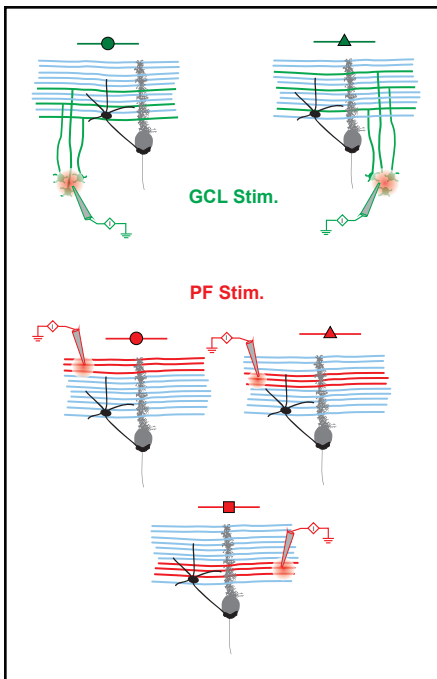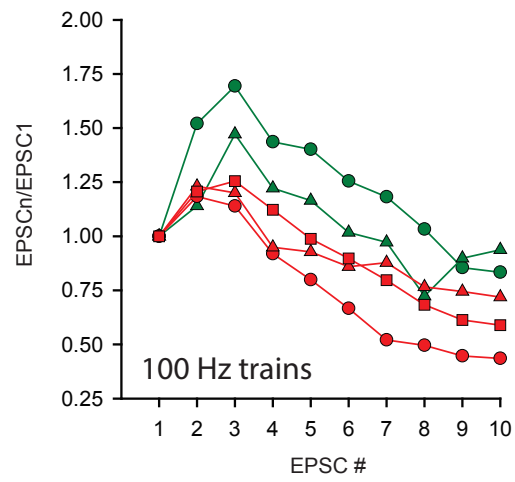

B

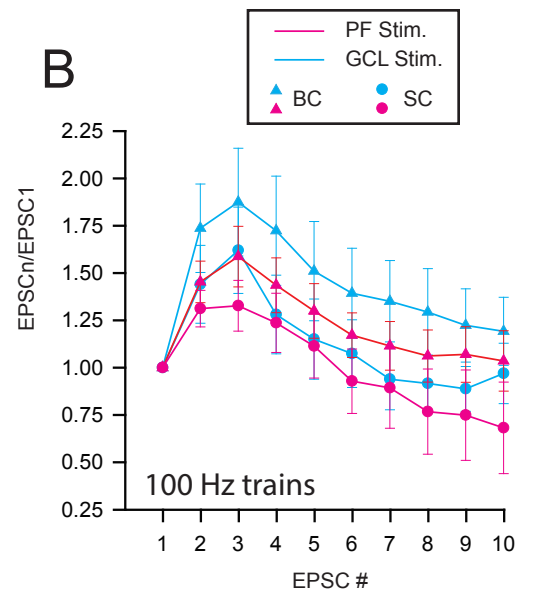

Supplement: supp [file elife-41586-supp-v1.zip]

A

## MLI Depth

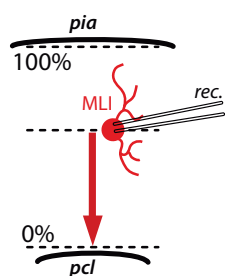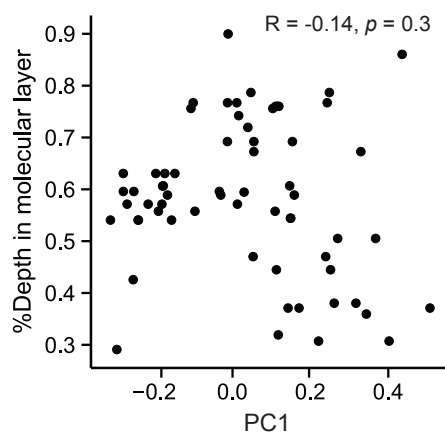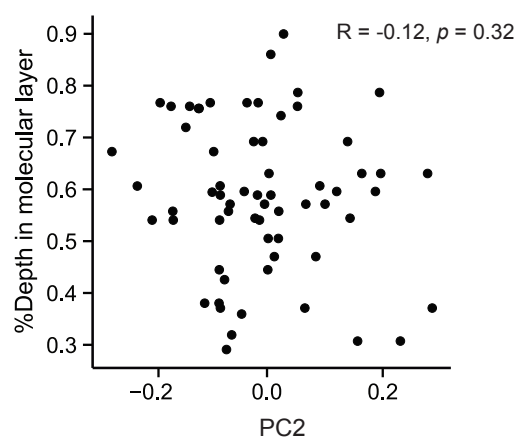

B

## Synapse Depth

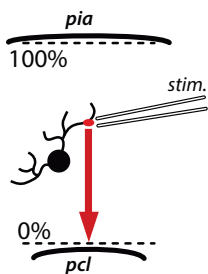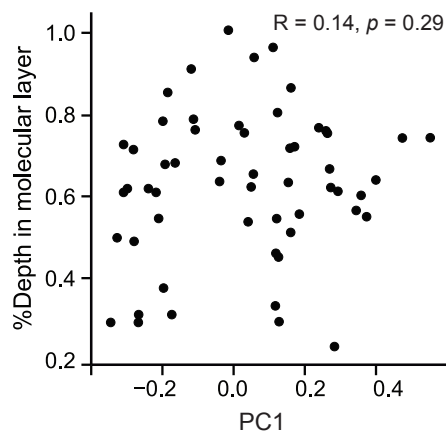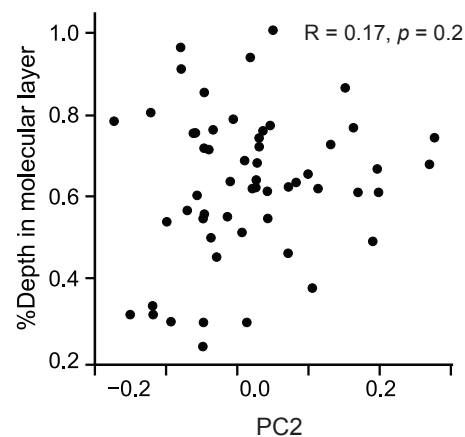

C

## Distance input from soma

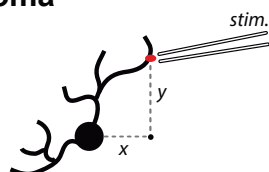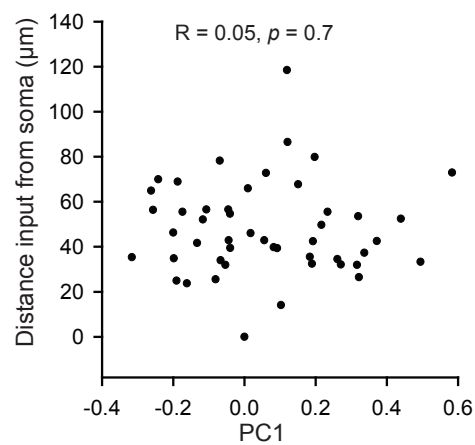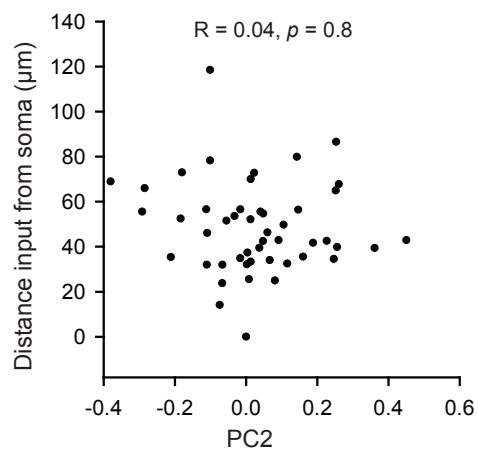

Supplement: supp [file elife-41586-supp-v1.zip]

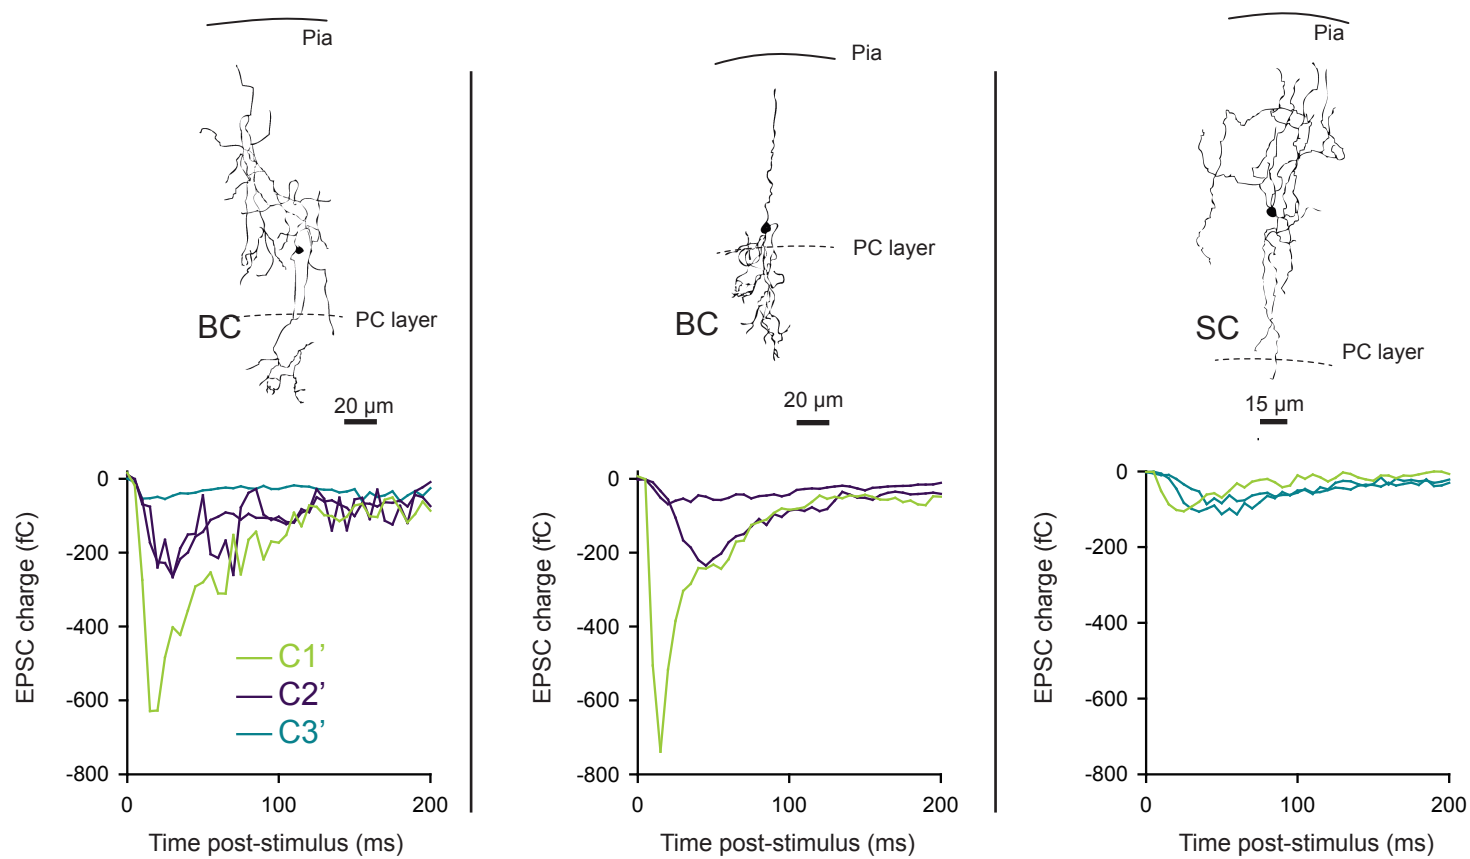

Dorgans et al, Figure 7 - figure supplement 2

Supplement: supp [file elife-41586-supp-v1.zip]

A

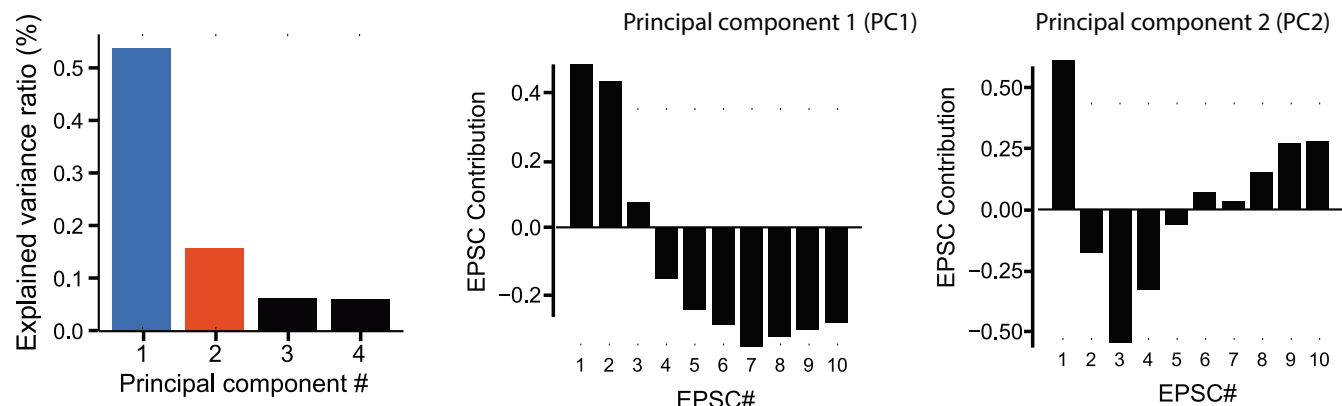

B

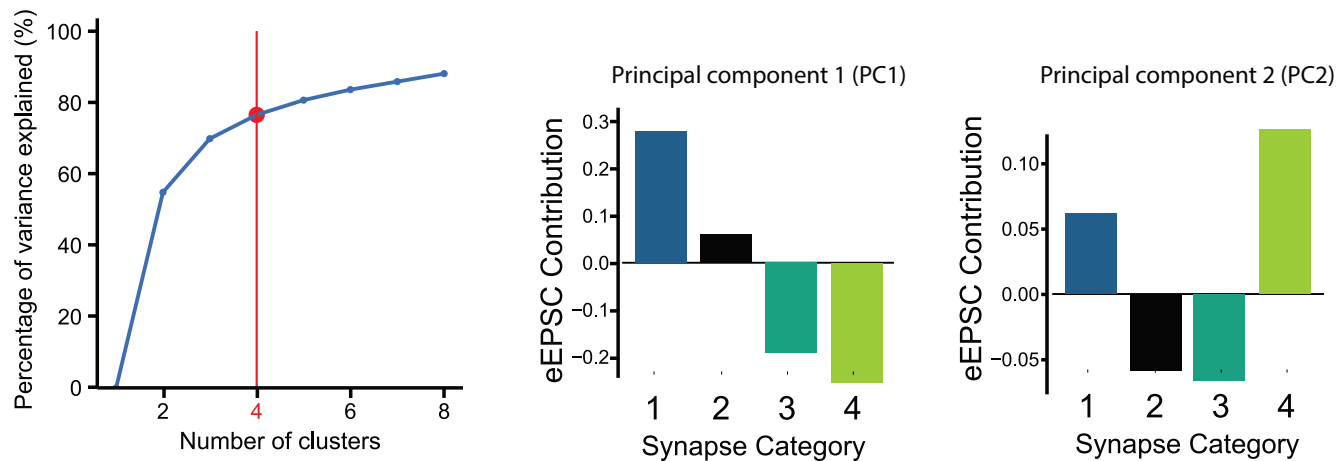

Supplement: supp [file elife-41586-supp-v1.zip]

**A**

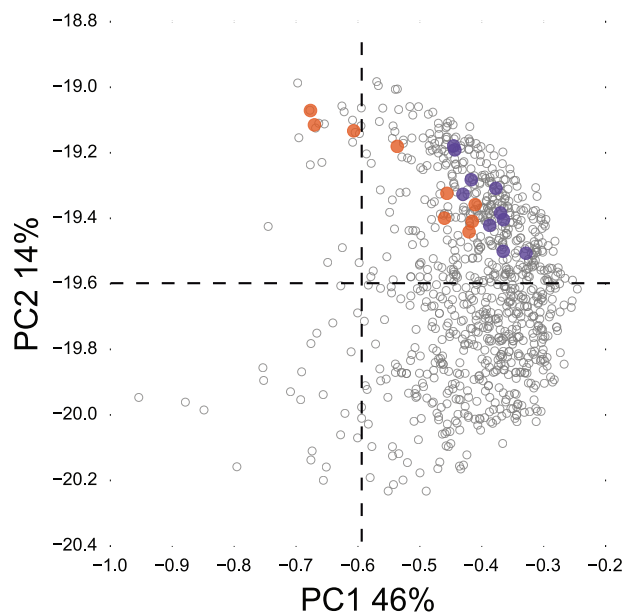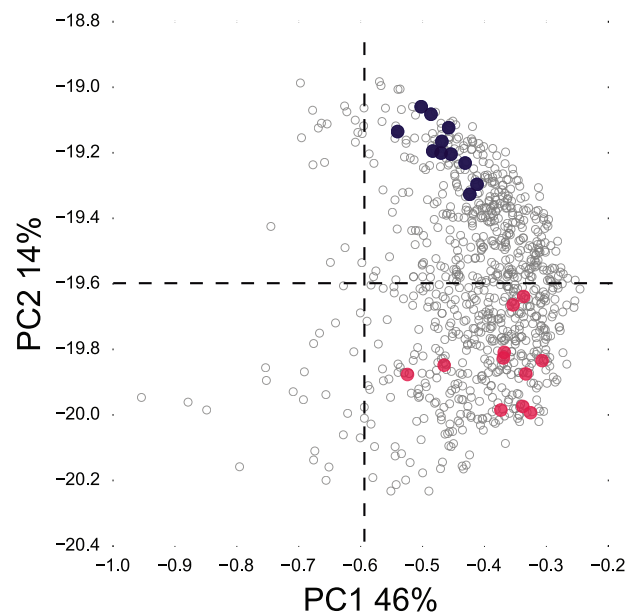

**B**

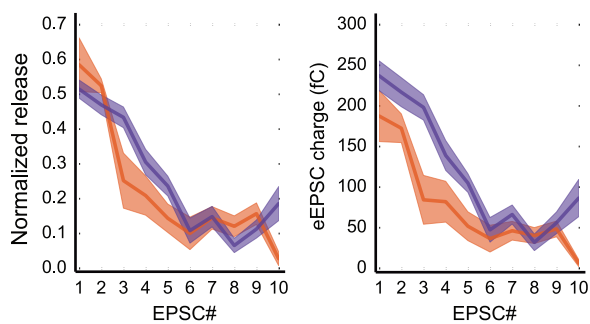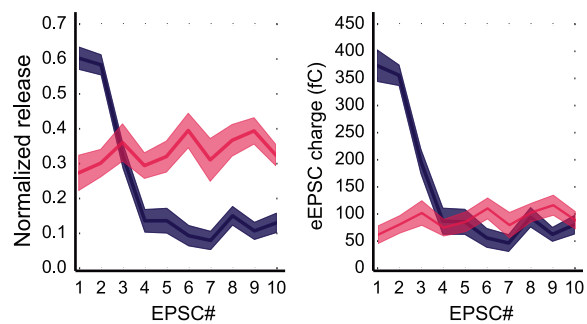

**C**

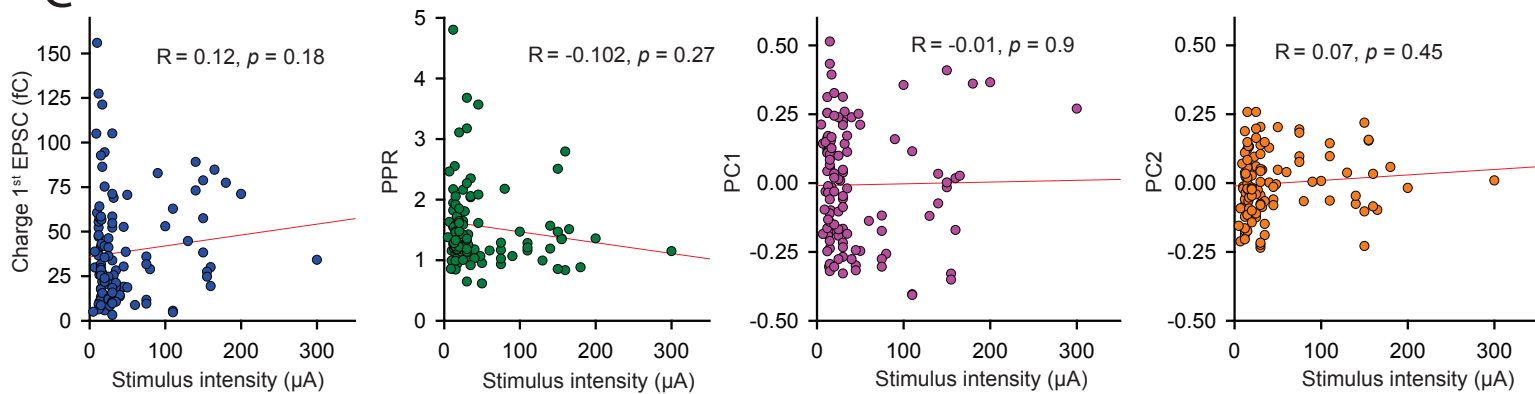

Supplement: supp [file elife-41586-supp-v1.zip › elife_poa_e41586_Figure_2_figure_supplement_2.pdf]
